# Supplementary material for: Online public concern about allergic rhinitis and its association with COVID-19 and air quality in China: an informative epidemiological study using Baidu index
Source: Springer Nature journal article supplement (doi:10.1186/s12889-024-17893-4), 2024-02-02
Supplement: MOESM5 [file 26693730]

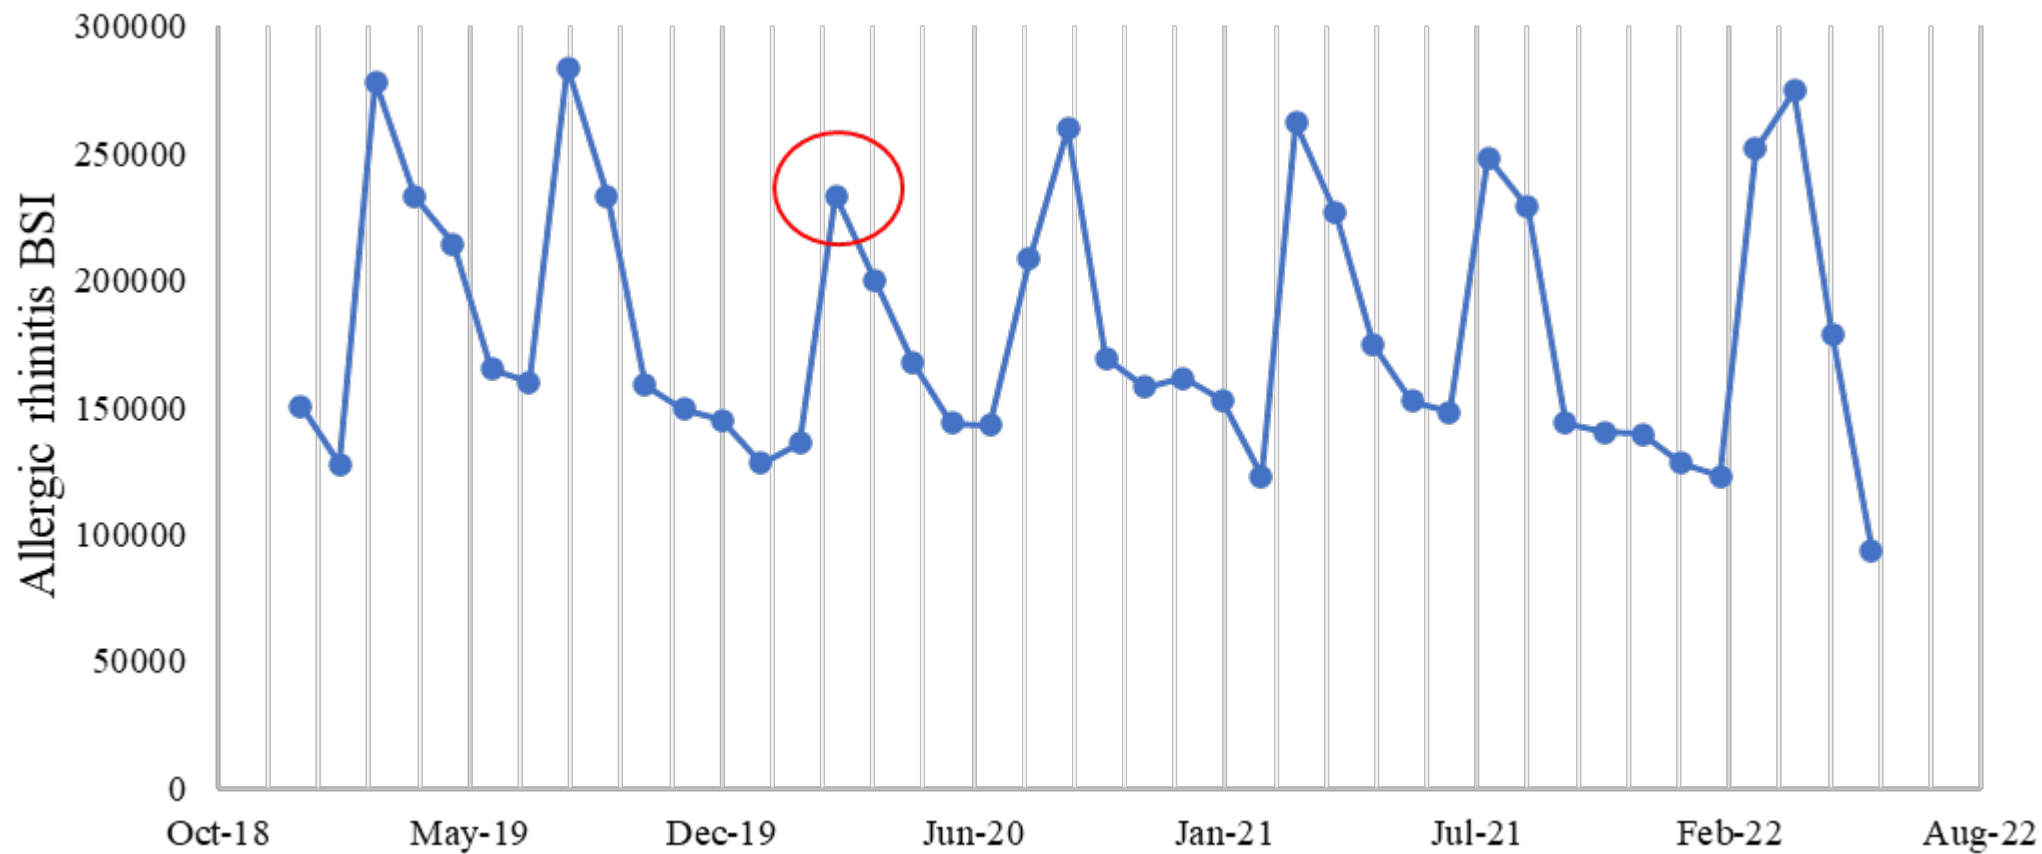

Figure S2 Allergic Rhinitis Search Trends in Beijing, from Jan 2019 to Jun 2022
