# Supplementary material for: Online public concern about allergic rhinitis and its association with COVID-19 and air quality in China: an informative epidemiological study using Baidu index
Source: Springer Nature journal article supplement (doi:10.1186/s12889-024-17893-4), 2024-02-02
Supplement: MOESM6 [file 26693730]

Table S3 Associations of allergic rhinitis-related BSI and AQI during the year before covid-19 in Beijing

| Variate                                                | AQI     |
|--------------------------------------------------------|---------|
| Frequent sneezing and runny nose                       | 0.199*  |
| Allergic rhinitis in children                          | 0.177*  |
| Dust mites allergic                                    | 0.174*  |
| Cold air-related allergic rhinitis                     | -0.16*  |
| Nasal spray                                            | -0.152* |
| Combined Allergic Rhinitis and Asthma Syndrome (CARAS) | 0.135*  |
| Dust mites-related allergic rhinitis                   | 0.118*  |
| How to treat allergic rhinitis                         | 0.107*  |

\*p<0.05
